# Supplementary material
Source: MDPI journal article supplement (https://www.mdpi.com/2227-9040/11/12/571)
Supplement: s1 [file s1]

Supplementary

# A Selective Fluorescent Optode for Lead(II) Based on the Dansylamidopropyl Pendant Arm Derivative of 1,4-dioxo-7,13-dithia-10-Azacyclopentadecane ([15]aneNS<sub>2</sub>O<sub>2</sub>)

Mojtaba Shamsipur <sup>1,\*</sup>, Moslem Mohammadi <sup>1</sup>, Massimiliano Arca <sup>2</sup>, Alessandra Garau <sup>2</sup>, Vito Lippolis <sup>2,\*</sup> and Ali Barati <sup>1</sup>

<sup>1</sup> Department of Chemistry, Razi University, Kermanshah, Iran; m.mohammadi@yahoo.com (M.M.); alibarati@razi.ac.ir (A.B.)

<sup>2</sup> Dipartimento di Scienze Chimiche e Geologiche, Università degli Studi di Cagliari, S.S. 554 Bivio per Sestu, 09042 Monserrato (CA), Italy; marca@unica.it (M.A.); agarau@unica.it (A.G.)

\* Correspondence: mshamsipur@yahoo.com, m.shamsipur@razi.ac.ir (M.S.); lippolis@unica.it (V.L.)

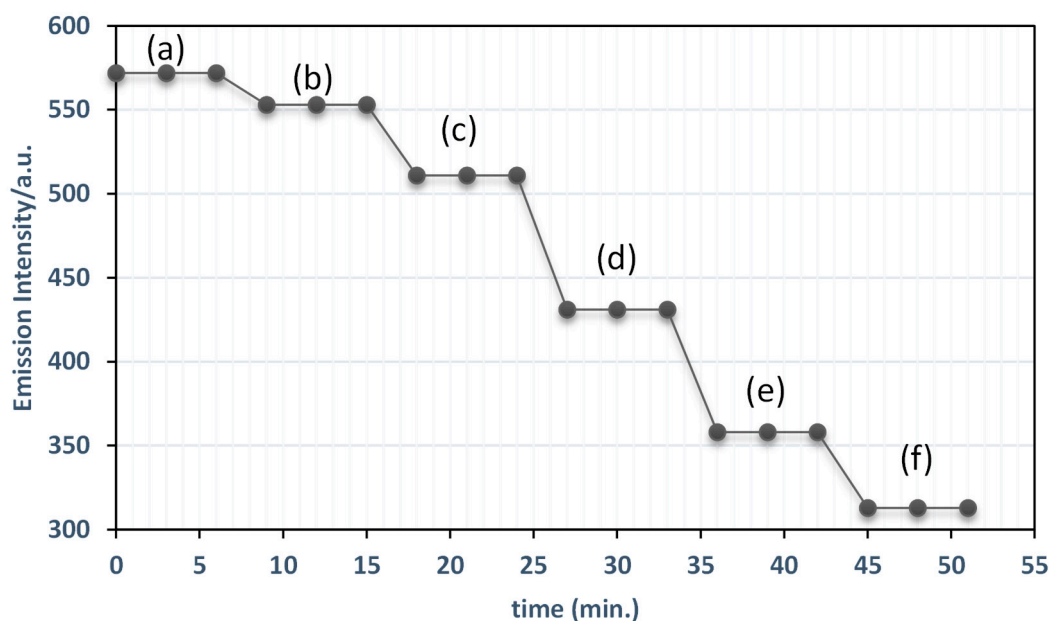

**Figure S1.** Plot of the fluorescence emission intensity *versus* time of the optode at the optimized composition for step changes in the concentration of Pb(II): (a) 0; (b)  $1.0 \times 10^{-8}$ ; (c)  $1.0 \times 10^{-7}$ ; (d)  $1.0 \times 10^{-6}$ ; (e)  $1.0 \times 10^{-5}$ ; (f)  $1.0 \times 10^{-4}$  M.

**Table S1.** DFT (mPW1PW/def2-SVP) gas-phase total electronic energy E, sum of total electronic energy and thermal free energy G, thermal enthalpy H calculated for L, the free Pb<sup>2+</sup> ion and the complexes [Pb(L)]<sup>2+</sup> and [Pb(L)<sub>2</sub>]<sup>2+</sup>; reaction free energy ΔG<sub>r</sub> and total electronic energy stabilization energy ΔE<sub>r</sub> calculated for the formation of the 1:1 and 1:2 complexes [Pb(L)]<sup>2+</sup> and [Pb(L)<sub>2</sub>]<sup>2+</sup>. All energies are provided in Hartree.

|                                     | G          | H          | E          | ΔG <sub>r</sub>      | ΔE <sub>r</sub>      |
|-------------------------------------|------------|------------|------------|----------------------|----------------------|
| L                                   | −2633.5017 | −2633.3875 | −2634.0558 | —                    | —                    |
| Pb <sup>++</sup>                    | −192.1677  | −192.1478  | −192.1501  | —                    | —                    |
| [Pb(L)] <sup>2+</sup>               | −2826.0541 | −2825.9431 | −2826.6164 | −0.3847 <sup>a</sup> | −0.4105 <sup>c</sup> |
| [Pb(L) <sub>2</sub> ] <sup>2+</sup> | −5459.5832 | −5459.3821 | −5460.7257 | −0.0275 <sup>b</sup> | −0.0535 <sup>d</sup> |

<sup>a–d</sup> Corresponding to −241.4 (a), −17.2 (b), −257.6 (c), and −33.5 (d) kcal/mol, respectively.

**Table S2.** DFT (mPW1PW/def2-SVP) gas-phase optimized geometry for L (C<sub>25</sub>H<sub>39</sub>N<sub>3</sub>O<sub>4</sub>S<sub>3</sub>) in orthogonal Cartesian format.

| Center | Atomic | Coordinates (Angstroms) |           |           |
|--------|--------|-------------------------|-----------|-----------|
| Number | Number | X                       | Y         | Z         |
| 1      | 6      | −3.092183               | 1.271340  | 0.924713  |
| 2      | 1      | −3.451927               | 0.947579  | −0.064291 |
| 3      | 1      | −2.036828               | 1.565235  | 0.817574  |
| 4      | 6      | −3.253127               | 0.113629  | 1.927645  |
| 5      | 1      | −2.661308               | 0.328932  | 2.831290  |
| 6      | 1      | −4.306430               | 0.105734  | 2.258762  |
| 7      | 6      | −3.895808               | 3.846697  | 0.105774  |
| 8      | 1      | −2.828746               | 3.973945  | −0.133393 |
| 9      | 1      | −4.259943               | 4.808610  | 0.495091  |
| 10     | 6      | −4.674779               | 3.491327  | −1.147082 |
| 11     | 1      | −4.370730               | 2.491982  | −1.509074 |
| 12     | 1      | −4.399162               | 4.208794  | −1.945750 |
| 13     | 6      | −6.830897               | 2.583561  | −1.551829 |
| 14     | 1      | −6.480025               | 2.392364  | −2.582779 |
| 15     | 1      | −7.853569               | 2.980088  | −1.627130 |
| 16     | 6      | −6.834089               | 1.278698  | −0.770757 |
| 17     | 1      | −7.266355               | 1.456936  | 0.229550  |
| 18     | 1      | −5.786627               | 0.963560  | −0.607417 |
| 19     | 6      | −7.022727               | −0.997575 | −1.362845 |
| 20     | 1      | −7.519651               | −1.612966 | −2.126517 |
| 21     | 1      | −5.940725               | −1.007515 | −1.596812 |
| 22     | 6      | −7.246801               | −1.606720 | 0.019720  |
| 23     | 1      | −8.317099               | −1.802988 | 0.177779  |
| 24     | 1      | −6.934566               | −0.906258 | 0.808179  |
| 25     | 6      | −4.959031               | −2.593203 | 1.309796  |
| 26     | 1      | −4.535616               | −3.499005 | 1.768196  |
| 27     | 1      | −5.362036               | −1.984341 | 2.133496  |
| 28     | 6      | −3.871910               | −1.822405 | 0.555498  |
| 29     | 1      | −3.358908               | −2.512539 | −0.131327 |

---

|    |    |           |           |           |
|----|----|-----------|-----------|-----------|
| 30 | 1  | -4.352384 | -1.072077 | -0.097001 |
| 31 | 7  | -2.920346 | -1.198422 | 1.442511  |
| 32 | 16 | -4.076601 | 2.691164  | 1.494589  |
| 33 | 8  | -6.050813 | 3.550845  | -0.901137 |
| 34 | 8  | -7.538940 | 0.299070  | -1.485593 |
| 35 | 16 | -6.347857 | -3.169665 | 0.285443  |
| 36 | 6  | -1.554496 | -1.648352 | 1.441294  |
| 37 | 1  | -1.079521 | -1.312904 | 2.378899  |
| 38 | 1  | -1.549393 | -2.751322 | 1.488522  |
| 39 | 6  | -0.681588 | -1.209311 | 0.257903  |
| 40 | 1  | -1.179350 | -1.495808 | -0.684642 |
| 41 | 1  | -0.587227 | -0.112879 | 0.240728  |
| 42 | 6  | 0.703351  | -1.832734 | 0.307751  |
| 43 | 1  | 0.629753  | -2.933724 | 0.323883  |
| 44 | 1  | 1.214408  | -1.546741 | 1.239162  |
| 45 | 7  | 1.514177  | -1.366689 | -0.809654 |
| 46 | 1  | 1.101209  | -1.480033 | -1.732538 |
| 47 | 8  | 3.382663  | -2.058576 | -2.322717 |
| 48 | 16 | 3.110211  | -1.845585 | -0.907054 |
| 49 | 8  | 3.337148  | -2.913864 | 0.061642  |
| 50 | 6  | 4.033471  | -0.411613 | -0.367388 |
| 51 | 6  | 5.456587  | -0.519635 | -0.267301 |
| 52 | 6  | 3.373117  | 0.762229  | -0.087211 |
| 53 | 6  | 6.166748  | -1.728214 | -0.488754 |
| 54 | 6  | 6.181018  | 0.658963  | 0.101071  |
| 55 | 6  | 4.096849  | 1.889590  | 0.350273  |
| 56 | 1  | 2.289793  | 0.801086  | -0.194474 |
| 57 | 6  | 7.531503  | -1.755408 | -0.339732 |
| 58 | 1  | 5.629161  | -2.636285 | -0.753088 |
| 59 | 6  | 7.616882  | 0.619258  | 0.168068  |
| 60 | 6  | 5.466386  | 1.834465  | 0.443638  |
| 61 | 1  | 3.561371  | 2.800123  | 0.622948  |
| 62 | 6  | 8.258774  | -0.591054 | -0.022039 |
| 63 | 1  | 8.070274  | -2.691763 | -0.494903 |
| 64 | 1  | 6.031694  | 2.689919  | 0.812185  |
| 65 | 1  | 9.345050  | -0.647147 | 0.043045  |
| 66 | 7  | 8.314737  | 1.809761  | 0.450439  |
| 67 | 6  | 8.330677  | 2.802614  | -0.608251 |
| 68 | 1  | 8.585507  | 3.790362  | -0.194883 |
| 69 | 1  | 9.072663  | 2.560525  | -1.395723 |
| 70 | 1  | 7.348445  | 2.877317  | -1.089165 |
| 71 | 6  | 9.592988  | 1.684573  | 1.105898  |

|    |   |           |          |          |
|----|---|-----------|----------|----------|
| 72 | 1 | 10.409147 | 1.344292 | 0.435545 |
| 73 | 1 | 9.890196  | 2.665347 | 1.505985 |
| 74 | 1 | 9.521471  | 0.982273 | 1.946686 |

**Table S3.** DFT (mPW1PW/def2-SVP) gas-phase optimized geometry for [Pb(L)]<sup>2+</sup> (C<sub>25</sub>H<sub>39</sub>N<sub>3</sub>O<sub>4</sub>PbS<sub>3</sub><sup>2+</sup>) in orthogonal Cartesian format.

| Center<br>Number | Atomic<br>Number | Coordinates (Angstroms) |           |           |
|------------------|------------------|-------------------------|-----------|-----------|
|                  |                  | X                       | Y         | Z         |
| 1                | 82               | 1.724837                | -0.051136 | 0.353303  |
| 2                | 16               | 3.175814                | 2.508352  | 0.795483  |
| 3                | 7                | 1.162859                | 1.636240  | -1.660679 |
| 4                | 16               | 1.500602                | -1.701445 | -2.081039 |
| 5                | 8                | 3.162994                | -2.446689 | 0.320228  |
| 6                | 8                | 4.301099                | -0.241844 | 1.389551  |
| 7                | 6                | 3.721759                | -2.548771 | 1.615773  |
| 8                | 1                | 2.943213                | -2.397938 | 2.387235  |
| 9                | 1                | 4.157755                | -3.548845 | 1.777205  |
| 10               | 6                | 4.813848                | -1.517685 | 1.740769  |
| 11               | 1                | 5.184115                | -1.518993 | 2.779253  |
| 12               | 1                | 5.655207                | -1.770455 | 1.073156  |
| 13               | 6                | 1.969510                | -3.375479 | -1.520523 |
| 14               | 1                | 1.136853                | -4.039810 | -1.787080 |
| 15               | 1                | 2.842974                | -3.680494 | -2.112220 |
| 16               | 6                | 2.246625                | -3.462604 | -0.033922 |
| 17               | 1                | 2.668803                | -4.457821 | 0.188141  |
| 18               | 1                | 1.311283                | -3.365025 | 0.547474  |
| 19               | 6                | 5.156119                | 0.840461  | 1.712991  |
| 20               | 1                | 6.211738                | 0.535343  | 1.619628  |
| 21               | 1                | 4.992692                | 1.153472  | 2.758657  |
| 22               | 6                | 4.923213                | 1.986790  | 0.752726  |
| 23               | 1                | 5.181444                | 1.688650  | -0.273571 |
| 24               | 1                | 5.552422                | 2.841781  | 1.036587  |
| 25               | 6                | 2.902922                | 3.282168  | -0.833079 |
| 26               | 1                | 3.652342                | 2.911820  | -1.546061 |
| 27               | 1                | 3.055262                | 4.365384  | -0.731210 |
| 28               | 6                | 3.017517                | -1.082137 | -2.894915 |
| 29               | 1                | 3.881226                | -1.624395 | -2.489842 |
| 30               | 1                | 2.933574                | -1.319939 | -3.965113 |
| 31               | 6                | -1.195324               | 1.856065  | -0.709857 |
| 32               | 1                | -1.235900               | 2.947005  | -0.593680 |

---

|    |    |           |           |           |
|----|----|-----------|-----------|-----------|
| 33 | 1  | -2.222750 | 1.550834  | -0.965738 |
| 34 | 7  | -0.774124 | 1.308682  | 0.585920  |
| 35 | 1  | -0.888204 | 1.968213  | 1.356577  |
| 36 | 16 | -1.330511 | -0.220216 | 1.127145  |
| 37 | 8  | -0.658508 | -0.331859 | 2.418947  |
| 38 | 8  | -0.853972 | -1.106534 | 0.046484  |
| 39 | 6  | -3.068226 | -0.214106 | 1.321978  |
| 40 | 6  | -3.989849 | -0.363504 | 0.226590  |
| 41 | 6  | -3.478578 | -0.013910 | 2.634423  |
| 42 | 6  | -3.640519 | -0.771148 | -1.079963 |
| 43 | 6  | -5.377898 | -0.145939 | 0.544645  |
| 44 | 6  | -4.843625 | 0.048767  | 2.926469  |
| 45 | 1  | -2.738507 | 0.055965  | 3.431640  |
| 46 | 6  | -4.633390 | -0.941380 | -2.025775 |
| 47 | 1  | -2.611210 | -1.019778 | -1.323192 |
| 48 | 6  | -6.375503 | -0.196173 | -0.504225 |
| 49 | 6  | -5.761612 | -0.005268 | 1.896516  |
| 50 | 1  | -5.174010 | 0.130908  | 3.961643  |
| 51 | 6  | -5.975671 | -0.653450 | -1.759832 |
| 52 | 1  | -4.362953 | -1.290342 | -3.024165 |
| 53 | 1  | -6.824195 | 0.019807  | 2.133272  |
| 54 | 1  | -6.704739 | -0.751318 | -2.561825 |
| 55 | 7  | -7.683456 | 0.138658  | -0.237588 |
| 56 | 6  | -8.026517 | 1.399289  | 0.402083  |
| 57 | 1  | -8.460778 | 2.094055  | -0.337734 |
| 58 | 1  | -8.768304 | 1.256931  | 1.203094  |
| 59 | 1  | -7.140724 | 1.883423  | 0.826006  |
| 60 | 6  | -8.730531 | -0.370622 | -1.096707 |
| 61 | 1  | -9.688897 | -0.303167 | -0.564590 |
| 62 | 1  | -8.830969 | 0.198008  | -2.039737 |
| 63 | 1  | -8.554165 | -1.426871 | -1.334679 |
| 64 | 6  | 3.174409  | 0.418495  | -2.680576 |
| 65 | 1  | 3.957313  | 0.766744  | -3.371292 |
| 66 | 1  | 3.576078  | 0.607000  | -1.669451 |
| 67 | 6  | 1.899259  | 1.250079  | -2.897511 |
| 68 | 1  | 2.141647  | 2.166741  | -3.458444 |
| 69 | 1  | 1.210504  | 0.689858  | -3.546014 |
| 70 | 6  | 1.475332  | 3.027099  | -1.287892 |
| 71 | 1  | 0.802085  | 3.336823  | -0.477684 |
| 72 | 1  | 1.260885  | 3.696372  | -2.142041 |
| 73 | 6  | -0.293965 | 1.459826  | -1.874689 |
| 74 | 1  | -0.456238 | 0.400480  | -2.116140 |

---

|    |   |           |          |           |
|----|---|-----------|----------|-----------|
| 75 | 1 | -0.623684 | 2.044846 | -2.752566 |
|----|---|-----------|----------|-----------|

---

**Table S4.** DFT (mPW1PW/def2-SVP) gas-phase optimized geometry for  $[\text{Pb}(\text{L})_2]^{2+}$  ( $\text{C}_{50}\text{H}_{78}\text{N}_6\text{O}_8\text{PbS}_6^{2+}$ ) in orthogonal Cartesian format.

---

| Center<br>Number | Atomic<br>Number | Coordinates (Angstroms) |   |   |
|------------------|------------------|-------------------------|---|---|
|                  |                  | X                       | Y | Z |

---

|    |    |           |           |           |
|----|----|-----------|-----------|-----------|
| 1  | 82 | -0.829455 | -2.784792 | 1.032077  |
| 2  | 7  | -1.205774 | -0.047638 | -2.123159 |
| 3  | 7  | 2.022992  | -3.627152 | 0.463011  |
| 4  | 6  | -1.110060 | 1.193656  | -2.896420 |
| 5  | 1  | -2.057556 | 1.311669  | -3.443252 |
| 6  | 1  | -0.345526 | 1.001547  | -3.664853 |
| 7  | 6  | -0.781084 | 2.464594  | -2.123672 |
| 8  | 1  | -0.823382 | 3.292107  | -2.848366 |
| 9  | 1  | -1.570248 | 2.664215  | -1.383310 |
| 10 | 6  | 2.984123  | -4.079825 | 1.481371  |
| 11 | 1  | 2.888966  | -5.175107 | 1.510204  |
| 12 | 1  | 4.018005  | -3.873643 | 1.166543  |
| 13 | 6  | 2.754429  | -3.513567 | 2.875747  |
| 14 | 1  | 2.898651  | -2.427283 | 2.872780  |
| 15 | 1  | 3.586737  | -3.899649 | 3.482716  |
| 16 | 6  | 1.468996  | -3.934025 | 3.594828  |
| 17 | 1  | 1.727653  | -4.111517 | 4.655053  |
| 18 | 1  | 1.141695  | -4.910561 | 3.205263  |
| 19 | 7  | 0.983700  | 3.688708  | -0.787910 |
| 20 | 7  | 0.273890  | -3.044177 | 3.589789  |
| 21 | 6  | 0.245246  | 4.003680  | 0.427994  |
| 22 | 1  | -0.366942 | 4.915675  | 0.295159  |
| 23 | 1  | -0.467921 | 3.189876  | 0.635208  |
| 24 | 6  | 1.113872  | 4.210059  | 1.663677  |
| 25 | 1  | 1.854239  | 5.006216  | 1.522564  |
| 26 | 1  | 0.477586  | 4.513989  | 2.509165  |
| 27 | 6  | -0.709758 | -3.739234 | 4.456840  |
| 28 | 1  | -0.313416 | -3.778094 | 5.489633  |
| 29 | 1  | -0.769959 | -4.783890 | 4.117803  |
| 30 | 6  | -2.116506 | -3.178685 | 4.536622  |
| 31 | 1  | -2.168886 | -2.126372 | 4.841627  |
| 32 | 1  | -2.659287 | -3.759249 | 5.296501  |
| 33 | 6  | 0.943703  | -0.620464 | 3.143678  |

---

|    |    |           |           |           |
|----|----|-----------|-----------|-----------|
| 34 | 1  | 1.193424  | 0.314176  | 3.666545  |
| 35 | 1  | 1.820362  | -0.857502 | 2.527593  |
| 36 | 6  | 0.574898  | -1.706398 | 4.140083  |
| 37 | 1  | -0.299611 | -1.364648 | 4.708616  |
| 38 | 1  | 1.394750  | -1.780582 | 4.878642  |
| 39 | 6  | 1.223330  | 4.783617  | -1.713440 |
| 40 | 1  | 1.800930  | 4.361828  | -2.551600 |
| 41 | 1  | 0.285533  | 5.184201  | -2.156161 |
| 42 | 6  | 2.026284  | 5.963610  | -1.170090 |
| 43 | 1  | 2.817774  | 5.637250  | -0.482139 |
| 44 | 1  | 2.506403  | 6.470918  | -2.019622 |
| 45 | 16 | -3.002966 | -3.404072 | 2.962710  |
| 46 | 16 | -0.309281 | -0.194672 | 1.899267  |
| 47 | 6  | -4.697816 | -2.838389 | 3.329984  |
| 48 | 1  | -5.311597 | -3.297339 | 2.542485  |
| 49 | 1  | -4.968399 | -3.318518 | 4.281795  |
| 50 | 6  | -4.952143 | -1.349334 | 3.380883  |
| 51 | 1  | -6.028458 | -1.220356 | 3.600293  |
| 52 | 1  | -4.762870 | -0.886073 | 2.393919  |
| 53 | 6  | -1.775822 | 0.311357  | 2.838513  |
| 54 | 1  | -2.465120 | 0.616464  | 2.038960  |
| 55 | 1  | -2.223124 | -0.540610 | 3.360743  |
| 56 | 6  | -1.560575 | 1.489765  | 3.785318  |
| 57 | 1  | -0.943318 | 1.197203  | 4.655803  |
| 58 | 1  | -1.025701 | 2.295960  | 3.263285  |
| 59 | 8  | -4.160890 | -0.754033 | 4.372053  |
| 60 | 8  | -2.786846 | 2.008189  | 4.195290  |
| 61 | 6  | -4.616535 | 0.512807  | 4.816138  |
| 62 | 1  | -5.318198 | 0.375197  | 5.657855  |
| 63 | 1  | -5.154876 | 1.037605  | 4.009274  |
| 64 | 6  | -3.467643 | 1.392917  | 5.261901  |
| 65 | 1  | -2.775394 | 0.818558  | 5.904510  |
| 66 | 1  | -3.887881 | 2.201155  | 5.879863  |
| 67 | 16 | 1.995389  | 2.727341  | 2.256904  |
| 68 | 16 | 0.955228  | 7.203327  | -0.362376 |
| 69 | 6  | 2.079248  | 8.622949  | -0.225265 |
| 70 | 1  | 2.658638  | 8.708751  | -1.157209 |
| 71 | 1  | 1.429168  | 9.507393  | -0.162722 |
| 72 | 6  | 2.999382  | 8.588610  | 0.975110  |
| 73 | 1  | 2.395986  | 8.518030  | 1.900175  |
| 74 | 1  | 3.571157  | 9.537446  | 1.026324  |
| 75 | 6  | 3.465056  | 2.665181  | 1.182702  |

---

|     |    |           |           |           |
|-----|----|-----------|-----------|-----------|
| 76  | 1  | 3.782392  | 1.612789  | 1.159819  |
| 77  | 1  | 3.135361  | 2.946452  | 0.173459  |
| 78  | 6  | 4.613281  | 3.539628  | 1.639648  |
| 79  | 1  | 4.959538  | 3.232228  | 2.646618  |
| 80  | 1  | 5.464885  | 3.395461  | 0.943044  |
| 81  | 8  | 4.194758  | 4.869839  | 1.646377  |
| 82  | 8  | 3.859177  | 7.490897  | 0.867650  |
| 83  | 6  | 4.557527  | 7.172222  | 2.033907  |
| 84  | 1  | 5.341296  | 7.921350  | 2.259865  |
| 85  | 1  | 3.870484  | 7.139604  | 2.901250  |
| 86  | 6  | 5.201240  | 5.819033  | 1.866269  |
| 87  | 1  | 5.909583  | 5.838614  | 1.016090  |
| 88  | 1  | 5.779847  | 5.583913  | 2.779921  |
| 89  | 16 | -2.517586 | -0.396250 | -1.209227 |
| 90  | 8  | -2.801579 | 0.582111  | -0.159814 |
| 91  | 8  | -2.213132 | -1.772212 | -0.689246 |
| 92  | 6  | -3.855454 | -0.537063 | -2.359146 |
| 93  | 6  | -4.769577 | 0.533095  | -2.643907 |
| 94  | 6  | -3.927391 | -1.768135 | -2.988738 |
| 95  | 6  | -4.819962 | 1.772947  | -1.959361 |
| 96  | 6  | -5.726175 | 0.281003  | -3.690140 |
| 97  | 6  | -4.943271 | -2.019881 | -3.918952 |
| 98  | 1  | -3.211880 | -2.548631 | -2.732751 |
| 99  | 6  | -5.777463 | 2.701707  | -2.300876 |
| 100 | 1  | -4.131932 | 1.979390  | -1.145724 |
| 101 | 6  | -6.641443 | 1.320568  | -4.099409 |
| 102 | 6  | -5.818483 | -1.010053 | -4.255963 |
| 103 | 1  | -5.041808 | -3.010944 | -4.362069 |
| 104 | 6  | -6.677225 | 2.492711  | -3.358410 |
| 105 | 1  | -5.820659 | 3.645307  | -1.753916 |
| 106 | 1  | -6.630395 | -1.204531 | -4.955963 |
| 107 | 1  | -7.378650 | 3.283191  | -3.620254 |
| 108 | 16 | 2.283840  | -2.162875 | -0.355677 |
| 109 | 8  | 0.896202  | -1.801058 | -0.744210 |
| 110 | 8  | 2.978620  | -1.293326 | 0.580705  |
| 111 | 6  | 3.182634  | -2.483559 | -1.836248 |
| 112 | 6  | 4.615562  | -2.580023 | -1.857243 |
| 113 | 6  | 2.394944  | -2.742059 | -2.949145 |
| 114 | 6  | 5.460631  | -2.401381 | -0.737153 |
| 115 | 6  | 5.205786  | -2.914132 | -3.127207 |
| 116 | 6  | 2.995902  | -3.154242 | -4.143906 |
| 117 | 1  | 1.312029  | -2.639214 | -2.886623 |



|     |   |           |           |           |
|-----|---|-----------|-----------|-----------|
| 118 | 6 | 6.818575  | -2.602533 | -0.870212 |
| 119 | 1 | 5.054884  | -2.081129 | 0.218253  |
| 120 | 6 | 6.643724  | -2.989467 | -3.260269 |
| 121 | 6 | 4.370166  | -3.249330 | -4.215332 |
| 122 | 1 | 2.376178  | -3.411445 | -5.002833 |
| 123 | 6 | 7.411813  | -2.899734 | -2.104505 |
| 124 | 1 | 7.462711  | -2.477855 | 0.002123  |
| 125 | 1 | 4.837103  | -3.617051 | -5.128180 |
| 126 | 1 | 8.494947  | -2.992173 | -2.160338 |
| 127 | 7 | 7.208319  | -3.199359 | -4.507092 |
| 128 | 7 | -7.486412 | 1.096164  | -5.182499 |
| 129 | 6 | -6.888538 | 0.897601  | -6.494284 |
| 130 | 1 | -7.540109 | 0.271193  | -7.121255 |
| 131 | 1 | -6.738586 | 1.861278  | -7.016402 |
| 132 | 1 | -5.911849 | 0.408158  | -6.415766 |
| 133 | 6 | -8.720885 | 1.846189  | -5.244935 |
| 134 | 1 | -8.582285 | 2.893886  | -5.574973 |
| 135 | 1 | -9.394974 | 1.362003  | -5.965031 |
| 136 | 1 | -9.217406 | 1.847944  | -4.266352 |
| 137 | 6 | 6.962005  | -2.242325 | -5.576425 |
| 138 | 1 | 7.781008  | -1.502734 | -5.634979 |
| 139 | 1 | 6.896901  | -2.751821 | -6.549494 |
| 140 | 1 | 6.032005  | -1.689188 | -5.409182 |
| 141 | 6 | 8.529407  | -3.784718 | -4.573978 |
| 142 | 1 | 8.697500  | -4.164261 | -5.591053 |
| 143 | 1 | 9.337883  | -3.062994 | -4.351122 |
| 144 | 1 | 8.609595  | -4.631973 | -3.881459 |
| 145 | 6 | 0.592442  | 2.456745  | -1.438339 |
| 146 | 1 | 1.362165  | 2.206234  | -2.190822 |
| 147 | 1 | 0.628522  | 1.653646  | -0.683879 |
| 148 | 1 | -0.354609 | -0.422236 | -1.698302 |
| 149 | 1 | 1.819823  | -4.348016 | -0.230166 |

**Table S5.** Imaginary and low-energy harmonic frequencies ( $\text{cm}^{-1}$ ) calculated for **L**,  $[\text{Pb}(\text{L})]^{2+}$ ,  $[\text{Pb}(\text{L})_2]^{2+}$  at DFT (mPW1PW/def2-SVP) in the gas-phase.

| <b>L</b>                       | <b>-1.415</b> | <b>-0.001</b> | <b>0.002</b> | <b>0.002</b> | <b>0.547</b> |
|--------------------------------|---------------|---------------|--------------|--------------|--------------|
|                                | 1.389         | 5.780         | 9.601        | 11.173       |              |
| $[\text{Pb}(\text{L})]^{2+}$   | -6.054        | -2.497        | -0.002       | -0.002       | -0.001       |
|                                | 1.873         | 11.588        | 20.378       | 24.796       |              |
| $[\text{Pb}(\text{L})_2]^{2+}$ | -2.798        | -1.616        | -0.004       | -0.001       | -0.001       |
|                                | 1.021         | 6.498         | 8.773        | 10.258       |              |
